# Supplementary material for: Monitoring the Early Signs of Cognitive Decline in Elderly by Computer Games: An MRI Study
Source: PLoS One. 2015 Feb 23;10(2):e0117918. doi: 10.1371/journal.pone.0117918 (PMC4338307; doi:10.1371/journal.pone.0117918)
Supplement: S1 Table — (XLSX) [file pone.0117918.s001.xlsx]

## Sheet: #LN00832
age	ACE anterograd	ACE total	MMSE	Geriatric	RAVLT delayed	RAVLT sum	STAI total	PAL test:	PAL test:	PAL test:	PAL test:	MCI Group (1=MCI)	Dementia	Memory Game:	Memory Game:	sumhippocampus	sumlhgrayvolentorhinal	sum_9grayvolPoletemporal	sex (1=male; 2=female)
	memory	score		depression	recall	of items	score	Raw number	Adjusted	Number	Raw number		Group (1=Dementia)	Trials Needed	Time Needed
	total score			total score		score 1-5		of total	number	of patterns	of completed			to Complete	to Complete
								trials	of total	correctly	stages
									trials	located
										after first
										trial
60	26	91	27	4	13	60	62	12	2	19	8	0	0	1.83	55.2	9746.7	3437	11414	1
86	25	91	27	2	12	47	32	13	23	8	6	0	0	3.67	195.1	6114.6	2657	10528	2
64	27	92	29	1	13	52	36	14	24	9	6	0	0	3	129.4	7825.1	3582	9698	2
77	25	85	29	3	10	40	27	13	23	12	6	0	0	3.25	236.2	6304.4	2354	8415	1
70	27	90	27	2	12	50	29	19	19	10	7	0	0	2.75	90.1	6851.9	3505	11081	2
73	26	93	28	2	7	40	29	15	25	8	6	0	0	3.25	158.6	7873	3797	9688	2
66	23	87	28	4	9	48	55	12	12	16	7	0	0	2.58	101.9	7289.6	2602	9947	2
63	24	93	28	1	10	46	27	16	16	16	7	0	0	3.25	140.8	9433.7	3914	11053	2
69	24	91	29	5	9	45	51	11	21	12	6	0	0	2.67	94.7	8290.2	3230	10398	2
82	24	83	27	7	7	31	49	22	52	1	4	0	0	3.33	185.7	6091	3865	10927	2
63	21	88	29	0	7	48	35	17	7	14	8	0	0	2.5	72.8	7947	2779	11271	2
76	24	89	29	3	14	46	34	22	22	10	7	0	0	3.75	131.4	8501.1	3438	10305	2
70	28	96	28	0	13	48	31	12	22	12	6	0	0	3.42	137.4	7798.1	2940	7720	2
68	23	85	28	1	9	47	47	15	15	14	7	0	0	2.83	146.4	6819.3	3395	9482	2
66	22	87	28	6	13	55	28	14	24	8	6	0	0	3.33	189.5	6613.9	2837	8707	2
59	24	86	27	1	8	51	38	11	21	14	6	0	0	2.75	119.5	7300.2	2869	10259	2
52	26	90	29	14	8	51	39	12	12	13	7	0	0	2.08	73.8	8262.8	3760	11815	1
86	22	87	28	8	5	39	49	10	20	11	6	0	0	4.92	236.7	5893.7	2610	7055	1
60	27	89	27	7	8	38	40	12	22	6	6	0	0	2.42	193.5	7764.2	2942	10907	2
64	27	94	28	2	7	43	26	17	7	18	8	0	0	3.33	128	7898.6	3262	9453	1
66	25	94	30	12	13	55	30	12	22	12	6	0	0	1.92	66.4	7234.5	3221	9947	2
78	18	81	26	4	12	50	50	22	12	12	8	0	0	3.58	147.4	6270.3	2356	8394	2
71	27	94	30	2	11	51	22	16	6	17	8	0	0	2.33	112.8	7229.5	3970	11121	1
58	27	96	30	1	14	63	48	12	2	21	8	0	0	2.75	100.1	7184	2768	9186	2
72	28	88	27	13	6	36	51	16	16	12	7	0	0	2	211.2	6775.5	2393	7943	2
65	26	93	29	2	9	63	34	14	24	10	6	0	0	2.42	79.5	8927.9	5058	12935	1
65	26	90	28	9	13	56	38	13	13	14	7	0	0	2.75	127.7	8060.3	3038	10137	2
57	24	86	28	14	10	46	46	13	23	6	6	0	0	3.92	180.6	7319.4	2578	10035	2
74	20	81	28	4	11	39	52	13	23	9	6	0	0	4.25	301.7	5591.7	3219	6423	1
70	28	95	29	2	14	58	26	18	8	7	8	0	0	2.67	114.6	7552.2	3411	9926	2
68	28	95	29	2	15	58	22	15	5	17	8	0	0	2.08	75.9	6816.7	3261	9447	2
63	28	98	30	8	7	53	31	13	3	18	8	0	0	2.25	77.2	8968.1	4003	11787	1
60	27	94	30	11	13	63	61	17	27	13	6	0	0	4.58	161.5	8071.6	2718	9936	2
71	20	88	30	9	9	46	37	23	23	9	7	0	0	4.08	223.7	5685.4	1815	9470	2
77	24	87	28	1	.	36	23	15	5	17	8	1	0	2.25	120.6	.	.	.	2
95	13	74	27	.	5	24	.	7	67	0	1	1	0	4.5	239	.	.	.	1
82	23	83	29	.	2	26	22	.	.	.	.	1	0	6.25	489.3	.	.	.	2
64	17	75	27	2	2	30	23	12	42	4	4	1	0	5.08	424.7	.	.	.	1
82	24	84	27	3	5	26	37	1	71	0	0	1	0	5.33	287.8	.	.	.	1
63	20	80	27	10	0	23	34	8	38	5	4	1	0	3.25	168.5	.	.	.	2
86	12	71	28	1	1	25	35	7	37	6	4	1	0	4.08	311.4	.	.	.	2
70	21	80	28	.	2	27	.	.	.	.	.	1	0	4	461.8	.	.	.	1
77	18	76	27	2	2	25	31	.	.	.	.	1	0	2.75	351.8	.	.	.	1
72	17	73	25	2	.	24	37	5	55	2	2	1	0	3.75	185.8	.	.	.	1
58	25	94	30	4	5	42	31	17	27	9	6	1	0	5.08	228.4	.	.	.	2
83	20	83	29	4	0	23	33	17	17	13	7	1	0	3.25	218.8	.	.	.	2
